# Supplementary material for: Modeling and cleaning RNA-seq data significantly improve detection of differentially expressed genes
Source: PubMed Central journal article supplement (PMC9670425; doi:10.1186/s12859-022-05023-z), 2022-11-16
Supplement: 12859_2022_5023_MOESM1_ESM.pdf [file 12859_2022_5023_MOESM1_ESM.pdf]

**Supplementary materials for the article: “Modeling and cleaning of RNA-seq data significantly improve detection of differentially expressed genes.”**

Igor V. Deyneko<sup>1\*</sup>, Orkhan N. Mustafaev<sup>2</sup>, Alexander A. Tyurin<sup>1</sup>, Ksenya V. Zhukova<sup>1</sup>, Alexander Varzari<sup>3</sup> and Irina V. Goldenkova-Pavlova<sup>1\*</sup>

<sup>1</sup>K.A. Timiryazev Institute of Plant Physiology RAS, IPP RAS, Moscow, Russia

<sup>2</sup>Genetic Resources Institute, Azerbaijan National Academy of Sciences, Baku, Azerbaijan

<sup>3</sup>Laboratory of Human Genetics, Chiril Draganiuc Institute of Phthisiopneumology, Kishinev, Republic of Moldova.

\*Corresponding authors

E-mail: igor.deyneko@inbox.ru (IVD), irengold58@gmail.com (IVG-P)

**Figure S1. Distribution of p-values.** Histograms of p-values of DEGs after different filters. Histograms in the background (grey) represent p-values of raw data, in foreground – filtered data. **A.** Identification of differential genes using EdgeR. **B.** Identification of differential genes using DESeq2. Of note, DESeq2 automatically filters genes according to internal criteria, so most of genes with p-value $\approx$ 1 are removed.

**A**

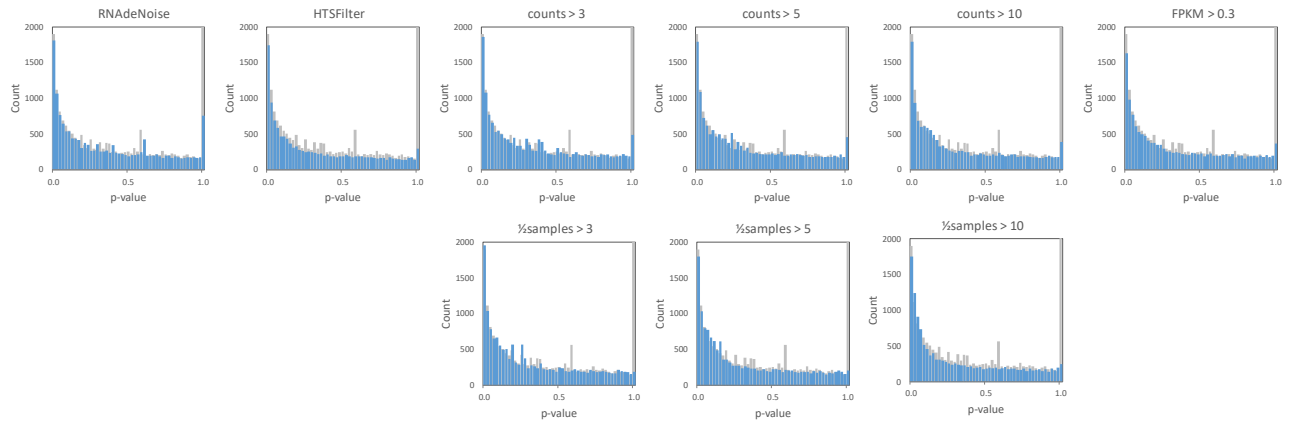

**B**

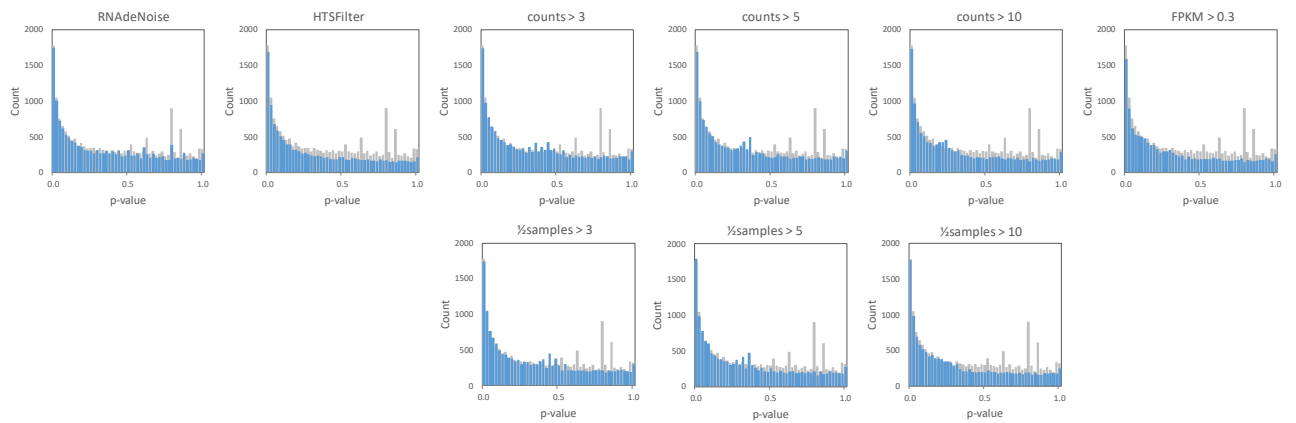

**Table S1. 24 genes uniquely identified with RNAdenoise.** Differentially translated genes were identified using EdgeR (polysomal vs. monosomal fractions) after filtering with RNAdenoise, but missed by all other filters.

| Geneid    | Map_STAR_1_1.1.sor<br>ted:bam | Map_STAR_2_2.1.sor<br>ted:bam | Map_STAR_3_3.1.sor<br>ted:bam | Map_STAR_4_1.2.sor<br>ted:bam | Map_STAR_5_2.2.sor<br>ted:bam | Map_STAR_6_3.2.sor<br>ted:bam | logFC    | logCPM   | PValue   | FDR      |
|-----------|-------------------------------|-------------------------------|-------------------------------|-------------------------------|-------------------------------|-------------------------------|----------|----------|----------|----------|
| AT1G03550 | 322                           | 430                           | 225                           | 101                           | 131                           | 178                           | -1.51423 | 2.255674 | 4.76E-06 | 5.54E-05 |
| AT1G05780 | 202                           | 440                           | 258                           | 106                           | 126                           | 140                           | -1.51332 | 2.131639 | 1.61E-05 | 0.000161 |
| AT1G06630 | 650                           | 1251                          | 1058                          | 316                           | 370                           | 546                           | -1.50298 | 3.858035 | 2.72E-08 | 5.57E-07 |
| AT1G19340 | 219                           | 288                           | 298                           | 110                           | 119                           | 102                           | -1.5016  | 1.972815 | 2.73E-06 | 3.39E-05 |
| AT1G80240 | 74                            | 100                           | 108                           | 276                           | 321                           | 294                           | 1.51988  | 1.933405 | 2.03E-06 | 2.62E-05 |
| AT2G16650 | 769                           | 520                           | 731                           | 196                           | 289                           | 356                           | -1.50615 | 3.310838 | 2.16E-08 | 4.53E-07 |
| AT2G22840 | 654                           | 892                           | 931                           | 306                           | 241                           | 493                           | -1.50501 | 3.601411 | 4.51E-09 | 1.12E-07 |
| AT2G40030 | 103                           | 118                           | 93                            | 296                           | 277                           | 446                           | 1.510168 | 2.091336 | 3.68E-07 | 5.71E-06 |
| AT3G01430 | 622                           | 652                           | 510                           | 252                           | 272                           | 192                           | -1.50638 | 3.131799 | 1.75E-07 | 2.95E-06 |
| AT3G15400 | 180                           | 202                           | 174                           | 59                            | 74                            | 102                           | -1.52339 | 1.429428 | 6.62E-06 | 7.40E-05 |
| AT3G49645 | 370                           | 484                           | 526                           | 175                           | 159                           | 241                           | -1.50493 | 2.754183 | 1.46E-08 | 3.18E-07 |
| AT3G51075 | 191                           | 141                           | 187                           | 55                            | 68                            | 97                            | -1.52594 | 1.328661 | 1.86E-05 | 0.000183 |
| AT3G58130 | 336                           | 412                           | 391                           | 140                           | 109                           | 230                           | -1.51933 | 2.473306 | 1.80E-07 | 3.03E-06 |
| AT4G02485 | 249                           | 376                           | 349                           | 95                            | 135                           | 176                           | -1.51842 | 2.244631 | 9.47E-07 | 1.32E-05 |
| AT4G03115 | 235                           | 270                           | 273                           | 101                           | 99                            | 121                           | -1.52335 | 1.918631 | 2.64E-07 | 4.24E-06 |
| AT4G03635 | 463                           | 479                           | 524                           | 210                           | 112                           | 295                           | -1.51291 | 2.84191  | 4.53E-07 | 6.86E-06 |
| AT4G31248 | 670                           | 523                           | 693                           | 189                           | 274                           | 318                           | -1.50802 | 3.209898 | 6.31E-09 | 1.51E-07 |
| AT4G31250 | 670                           | 523                           | 693                           | 189                           | 274                           | 318                           | -1.50802 | 3.209898 | 6.32E-09 | 1.51E-07 |
| AT4G36050 | 421                           | 620                           | 545                           | 180                           | 162                           | 327                           | -1.51039 | 2.954894 | 5.38E-08 | 1.03E-06 |
| AT4G38660 | 117                           | 192                           | 108                           | 447                           | 468                           | 399                           | 1.50667  | 2.508807 | 3.55E-06 | 4.30E-05 |
| AT5G02850 | 237                           | 126                           | 134                           | 492                           | 487                           | 630                           | 1.501071 | 2.771102 | 1.09E-06 | 1.51E-05 |
| AT5G18040 | 321                           | 540                           | 463                           | 147                           | 183                           | 215                           | -1.51486 | 2.691345 | 1.30E-07 | 2.28E-06 |
| AT5G41850 | 262                           | 212                           | 250                           | 97                            | 74                            | 135                           | -1.51446 | 1.817936 | 2.03E-06 | 2.62E-05 |
| AT5G44150 | 383                           | 445                           | 416                           | 155                           | 158                           | 205                           | -1.50243 | 2.606919 | 9.29E-09 | 2.14E-07 |

**Table S2. Number of detected DEGs after different cleaning procedures.** Differentially expressed genes were identified using EdgeR and DESeq2 in polysomal vs. monosomal fractions, after applying different cleaning methods – the presented approach, raw data (without cleaning), HTSfilter, fixed threshold of 3, 5 and 10 counts, FPKM > 0.3 and half of all samples should be above a threshold ( $\frac{1}{2}$ samples>3,5,10). Results are sorted according to the number of DEGs identified by EdgeR. Additionally, DEGs are classified using the total mRNA fraction into the three categories: low transcribed (lowest 1/3 quantile,  $\leq 268$  counts), moderate (middle 1/3 quantile, 269...1305 counts) and highly transcribed (top 1/3 quantile,  $\geq 1306$  counts). RNAdeNoise increases the number of DEGs in moderately expressed group of genes.

| Cleaning method          | #genes after cleaning | EdgeR         |                     |            |            | DESeq2       |                     |            |           |
|--------------------------|-----------------------|---------------|---------------------|------------|------------|--------------|---------------------|------------|-----------|
|                          |                       | #DEGs         | #DEGs by total mRNA |            |            | #DEGs        | #DEGs by total mRNA |            |           |
|                          |                       | total*        | Low                 | Mid        | High       | total*       | Low                 | Mid        | High      |
| RNAdeNoise               | 25356                 | 2439<br>+47** | 848<br>+3           | 844<br>+47 | 747<br>-3  | 2254<br>+29  | 666<br>-21          | 846<br>+47 | 742<br>+3 |
| Raw data                 | 37336                 | 2392          | 845                 | 797        | 750        | 2225         | 687                 | 799        | 739       |
| HTSfilter                | 22907                 | 2348<br>-44   | 803<br>-42          | 801<br>+4  | 744<br>-6  | 2233<br>+8   | 693<br>+6           | 800<br>+1  | 740<br>+1 |
| counts > 3               | 26089                 | 2309<br>-83   | 766<br>-79          | 800<br>+3  | 743<br>-7  | 2084<br>-141 | 552<br>-135         | 797<br>-2  | 735<br>-4 |
| counts > 5               | 25215                 | 2287<br>-105  | 738<br>-107         | 807<br>+10 | 742<br>-8  | 2055<br>-170 | 530<br>-157         | 786<br>-13 | 739<br>0  |
| counts > 10              | 23973                 | 2128<br>-264  | 593<br>-252         | 798<br>+1  | 737<br>-13 | 2049<br>-176 | 548<br>-139         | 767<br>-32 | 734<br>-5 |
| FPKM > 0.3               | 23237                 | 1930<br>-462  | 472<br>-373         | 722<br>-75 | 736<br>-14 | 2009<br>-216 | 556<br>-131         | 722<br>-77 | 731<br>-8 |
| $\frac{1}{2}$ samples>3  | 24173                 | 2363<br>-29   | 815<br>-30          | 801<br>+4  | 747<br>-3  | 2133<br>-92  | 597<br>-90          | 795<br>-4  | 741<br>+2 |
| $\frac{1}{2}$ samples>5  | 23549                 | 2325<br>-67   | 780<br>-65          | 799<br>+2  | 746<br>-4  | 2098<br>-127 | 564<br>-123         | 793<br>-6  | 741<br>+2 |
| $\frac{1}{2}$ samples>10 | 22573                 | 2238<br>-154  | 692<br>-153         | 805<br>+8  | 741<br>-9  | 2047<br>-178 | 518<br>-169         | 787<br>-12 | 742<br>+3 |

\* Criteria for DEGs:  $|\log_2(\text{FoldChange})| > 1.5$ ,  $p\text{-value} < 0.0001$ .

\*\* Increase or decrease compared to the Raw data.

**Table S3. Functional classification of DEGs.** Differentially translated genes were identified using EdgeR and DESeq2 (polysomal vs. monosomal fractions) and annotated using DAVID classification system. Three example categories related to gene regulation are presented – “regulation of biological process” (GO:0050789), keyword “transcription regulation” (KW-0805) and “molecular function regulator” (GO:0098772). Shown are absolute number of DEGs and relative number either to total number of DEGs or to total number of annotated DEGs. Relative numbers are comparable and are only slightly higher for “FPKM>0.3” and “count>10” filters, the filters which significantly reduce the absolute number of detected genes.

| Cleaning method | EdgeR, #DEGs                              |                                                            |                                                    |                                                        | DESeq2, #DEGs          |                                     |                             |                                 |
|-----------------|-------------------------------------------|------------------------------------------------------------|----------------------------------------------------|--------------------------------------------------------|------------------------|-------------------------------------|-----------------------------|---------------------------------|
|                 | any annotated function<br>(of total DEGs) | regulation of biological<br>process<br>(of annotated DEGs) | Transcription<br>regulation<br>(of annotated DEGs) | molecular function<br>regulator<br>(of annotated DEGs) | any annotated function | regulation of biological<br>process | Transcription<br>regulation | molecular function<br>regulator |
| RNAdeNoise      | 2144<br>(0.879)                           | 338<br>(0.158)                                             | 92<br>(0.043)                                      | 40<br>(0.019)                                          | 2013<br>(0.893)        | 324<br>(0.161)                      | 88<br>(0.044)               | 35<br>(0.017)                   |
| Raw data        | 2086<br>(0.872)                           | 326<br>(0.156)                                             | 87<br>(0.042)                                      | 38<br>(0.018)                                          | 1977<br>(0.889)        | 314<br>(0.159)                      | 82<br>(0.041)               | 35<br>(0.018)                   |
| HTSFilter       | 2056<br>(0.876)                           | 319<br>(0.155)                                             | 83<br>(0.04)                                       | 38<br>(0.018)                                          | 1984<br>(0.888)        | 314<br>(0.158)                      | 82<br>(0.041)               | 35<br>(0.018)                   |
| counts >3       | 2025<br>(0.877)                           | 320<br>(0.158)                                             | 84<br>(0.041)                                      | 38<br>(0.019)                                          | 1874<br>(0.899)        | 304<br>(0.162)                      | 79<br>(0.042)               | 35<br>(0.019)                   |
| counts > 5      | 2005<br>(0.877)                           | 318<br>(0.159)                                             | 85<br>(0.042)                                      | 36<br>(0.018)                                          | 1847<br>(0.899)        | 305<br>(0.165)                      | 78<br>(0.042)               | 34<br>(0.018)                   |
| counts > 10     | 1898<br>(0.892)                           | 310<br>(0.163)                                             | 85<br>(0.045)                                      | 38<br>(0.02)                                           | 1841<br>(0.898)        | 298<br>(0.162)                      | 79<br>(0.043)               | 37<br>(0.02)                    |
| FPKM>0.3        | 1770<br>(0.917)                           | 304<br>(0.172)                                             | 87<br>(0.049)                                      | 34<br>(0.019)                                          | 1830<br>(0.911)        | 306<br>(0.167)                      | 85<br>(0.046)               | 38<br>(0.021)                   |
| ½samples>3      | 2063<br>(0.921)                           | 360<br>(0.174)                                             | 84<br>(0.041)                                      | 38<br>(0.018)                                          | 1912<br>(0.934)        | 308<br>(0.162)                      | 81<br>(0.042)               | 32<br>(0.017)                   |

**Figure S2. Distribution of mRNA counts in data from [Dufek, 2021].** Distributions of RNA-seq data – original data, cleaned and exponential estimation. Sample names according to original publication.

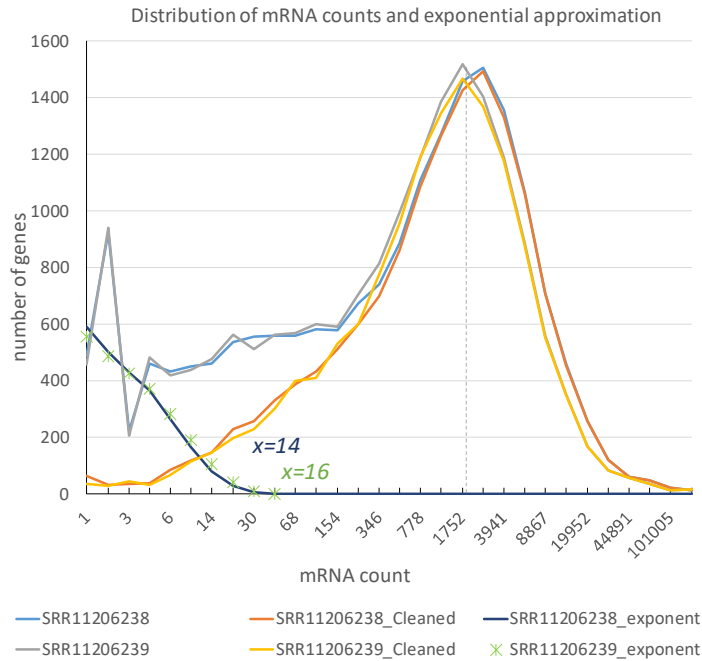

**Figure S3. Distribution of raw mRNA counts in DEGs detected using different filters and by Ingenuity Pathway Analysis (IPA) software on data from [Dufek, 2021].** RNAdenoise and raw data have a mode at around 50 counts. Threshold-based filters introduce bias into the data, so that the program for DEGs detection (EdgeR) preferentially finds DEGs with lower counts. Even stronger bias shows IPA used by the authors. Grey zone up to 16 counts indicates reads which, most probably originated from the random noise.

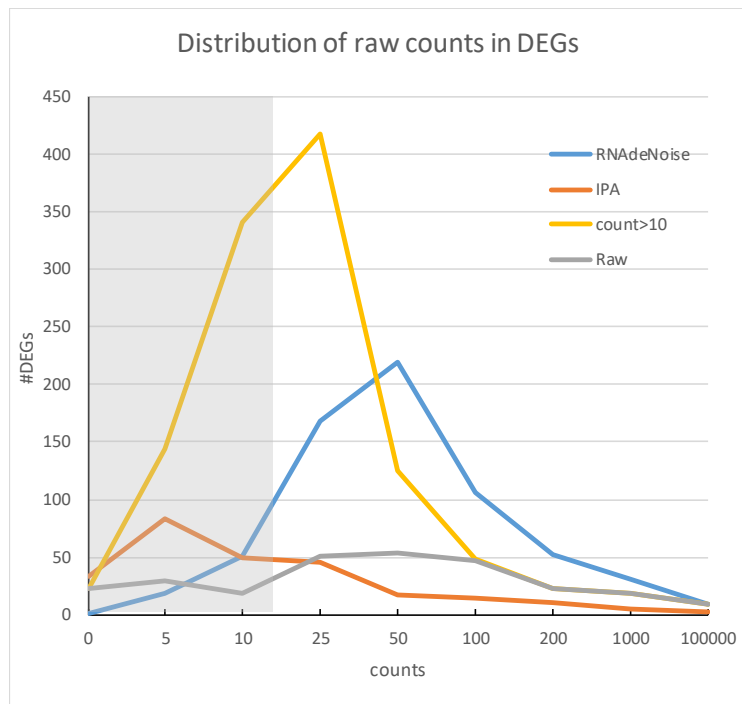

**Figure S4. Distribution of mRNA counts in raw and cleaned data.** RNA-seq data on *Arabidopsis thaliana* sequenced on BGISEQ-500 platform [Mhiri, et al., 2020]. Shown are raw mRNA reads, cleaned reads and the exponentially distributed part for samples 1A (treated with Cycloastragenol) and 1B (control). Modeling the data with RNAdeNoise gives that values of 15 and 19 should be subtracted from each mRNA raw count in samples 1A and 1B. Distribution of cleaned values (blue line) is similar to negative binomial, as theoretically expected.

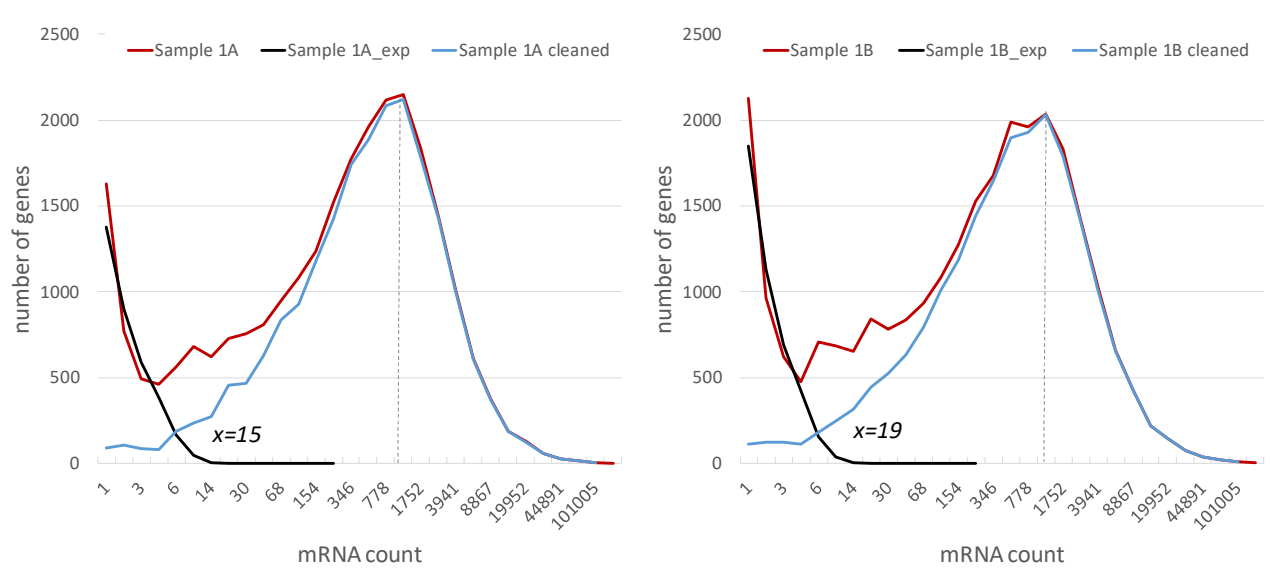

**Figure S5. Distribution of mRNA counts in raw and cleaned data from Mhiri [26].** Distribution of DEGs according to absolute level of mRNA (logCPM).

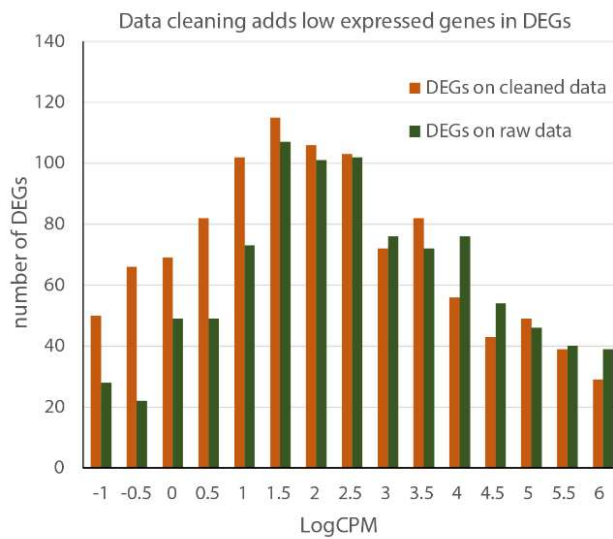

**Figure S6. Distribution of mRNA counts in data from [Bonnot and Nagel, 2021].** Distributions of RNA-seq data – original, cleaned and exponential estimation. **A.** Overview of the four example datasets of original and cleaned data. **B.** Detailed figures for each dataset with original, cleaned and exponential estimation.

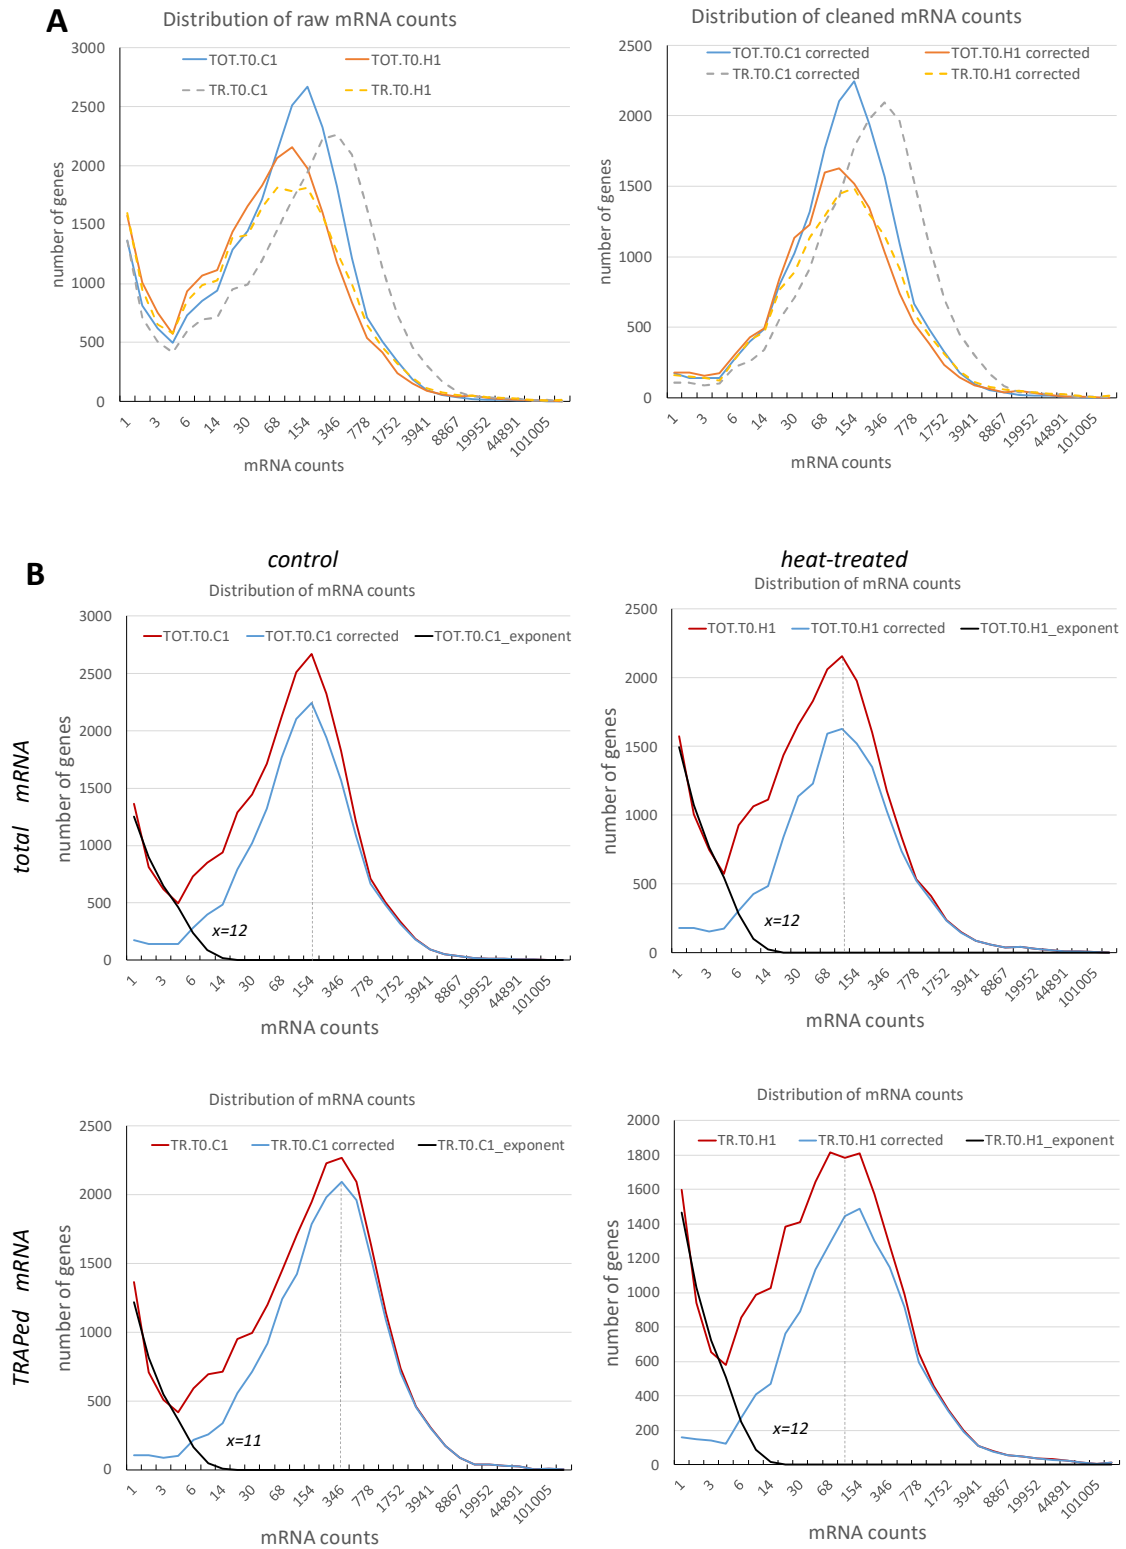



**Figure S7. Distribution of mRNA counts not suitable for cleaning with RNADeNoise.**

A) Data from bisulfite sequencing on Illumina, distribution of methylated DNA fragments according to the number of reads per fragment [Yang et. al., 2015]. The distribution has only one peak, and therefore cleaning with RNADeNoise will remove most of the reads. Here, sufficient sequencing depth cannot be reached due to the *in vivo* collection of TH17 cells from thymus and only a few cells were used for DNA extraction.

B) Distribution of mRNA counts from polysomal and monosomal RNA fractions from tomato, sequenced on MinION device (nanoporetech.com). Sequencing depth is far not enough to statistically separate noise and real reads (authors own data, not published).

**A**

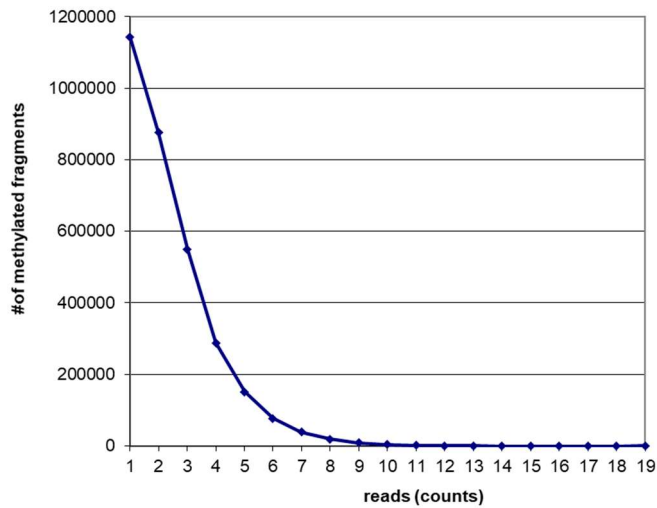

**B**

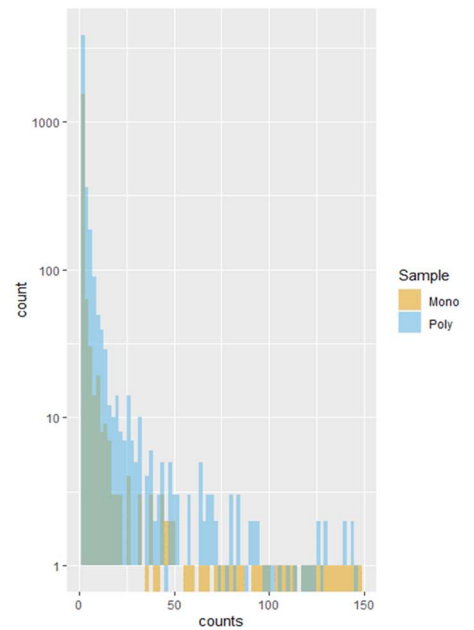

**Table S4. Raw counts for genes from tables 1-4 [Dufek1 et al., 2021].**

| Gene stable ID     | Gene name | NCBI gene ID | counts SRR11206238 | counts SRR11206239 |
|--------------------|-----------|--------------|--------------------|--------------------|
| ENSMUSG00000006179 | Prss16    | 54373        | 16                 | 2                  |
| ENSMUSG00000027776 | Il12a     | 16159        | 2                  | 4                  |
| ENSMUSG00000048304 | Slitrk3   | 386750       | 4                  | 12                 |
| ENSMUSG00000035472 | Slc25a21  | 217593       | 20                 | 0                  |
| ENSMUSG00000048349 | Pou4f1    | 18996        | 2                  | 0                  |
| ENSMUSG00000031910 | Has3      | 15118        | 13                 | 2                  |
| ENSMUSG00000022651 | Retnlg    | 245195       | 10                 | 4                  |
| ENSMUSG00000021565 | Slc6a19   | 74338        | 12                 | 2                  |
| ENSMUSG00000030142 | Clec4e    | 56619        | 10                 | 4                  |
| ENSMUSG00000035910 | Dcdc2a    | 195208       | 9                  | 4                  |
| ENSMUSG00000039462 | Col10a1   | 12813        | 7                  | 5                  |
| ENSMUSG00000035805 | Mlc1      | 170790       | 2                  | 4                  |
| ENSMUSG00000029618 | Ocm       | 18261        | 152                | 199                |
| ENSMUSG00000032053 | Pou2af1   | 18985        | 8                  | 4                  |
| ENSMUSG00000037548 | H2-DMb2   | 15000        | 18                 | 1                  |
| ENSMUSG00000043448 | Gjc2      | 118454       | 0                  | 12                 |
| ENSMUSG00000005465 | Il27ra    | 50931        | 52                 | 33                 |
| ENSMUSG00000019935 | Slc17a8   | 216227       | 6                  | 8                  |
| ENSMUSG00000061974 | Cldn24    | 1E+08        | 233                | 46                 |
| ENSMUSG00000022054 | Nefm      | 18040        | 14                 | 4                  |
| ENSMUSG00000031103 | Elf4      | 56501        | 72                 | 66                 |
| ENSMUSG00000020651 | Slc26a4   | 23985        | 7673               | 2985               |
| ENSMUSG00000073574 | Grxcr2    | 332309       | 4                  | 18                 |
| ENSMUSG00000002664 | Pspn      | 19197        | 4                  | 4                  |
| ENSMUSG00000030124 | Lag3      | 16768        | 2                  | 16                 |
| ENSMUSG00000028976 | Slc2a5    | 56485        | 6                  | 12                 |
| ENSMUSG00000037225 | Fgf2      | 14173        | 3                  | 2                  |
| ENSMUSG00000055561 | Spink5    | 72432        | 773                | 224                |
| ENSMUSG00000054191 | Klf1      | 16596        | 16                 | 0                  |
| ENSMUSG00000056073 | Grik2     | 14806        | 11                 | 16                 |
| ENSMUSG00000022762 | Ncam2     | 17968        | 6                  | 14                 |
| ENSMUSG00000029275 | Gfi1      | 14581        | 3                  | 11                 |
| ENSMUSG00000053519 | Kcnip1    | 70357        | 4                  | 1                  |
| ENSMUSG00000049649 | Gpr3      | 14748        | 10                 | 8                  |
| ENSMUSG00000024401 | Tnf       | 21926        | 16                 | 2                  |
| ENSMUSG00000024402 | Lta       | 16992        | 6                  | 0                  |
| ENSMUSG00000045534 | Kcna5     | 16493        | 24                 | 42                 |
| ENSMUSG00000047976 | Kcna1     | 16485        | 14                 | 6                  |
| ENSMUSG00000042686 | Jph1      | 57339        | 60                 | 29                 |
| ENSMUSG00000019893 | Ros1      | 19886        | 32                 | 2                  |
| ENSMUSG00000024673 | Ms4a1     | 12482        | 7                  | 0                  |

|                    |         |        |     |     |
|--------------------|---------|--------|-----|-----|
| ENSMUSG00000025318 | Jph3    | 57340  | 0   | 2   |
| ENSMUSG00000025221 | Kcnp2   | 80906  | 0   | 0   |
| ENSMUSG00000021614 | Vcan    | 13003  | 4   | 11  |
| ENSMUSG00000028072 | Ntrk1   | 18211  | 2   | 0   |
| ENSMUSG00000021070 | Bdkrb2  | 12062  | 8   | 2   |
| ENSMUSG00000079415 | Cntf    | 12803  | 2   | 1   |
| ENSMUSG00000041872 | Il17f   | 257630 | 2   | 0   |
| ENSMUSG00000028068 | Iqgap3  | 404710 | 42  | 24  |
| ENSMUSG00000078816 | Prkcg   | 18752  | 35  | 11  |
| ENSMUSG00000021732 | Fgf10   | 14165  | 19  | 2   |
| ENSMUSG00000056222 | Spock1  | 20745  | 53  | 111 |
| ENSMUSG00000004296 | Il12b   | 16160  | 26  | 4   |
| ENSMUSG00000051243 | Islr2   | 320563 | 2   | 14  |
| ENSMUSG00000038331 | Satb2   | 212712 | 32  | 10  |
| ENSMUSG00000068697 | Myoz1   | 59011  | 2   | 8   |
| ENSMUSG00000024749 | Tmc1    | 13409  | 37  | 70  |
| ENSMUSG00000026587 | Astn1   | 11899  | 8   | 11  |
| ENSMUSG00000046080 | Clec9a  | 232414 | 0   | 7   |
| ENSMUSG00000033576 | Apol6   | 71939  | 2   | 0   |
| ENSMUSG00000022683 | Pla2g10 | 26565  | 2   | 8   |
| ENSMUSG00000031162 | Gata1   | 14460  | 2   | 0   |
| ENSMUSG00000035681 | Kcnc2   | 268345 | 4   | 0   |
| ENSMUSG00000026770 | Il2ra   | 16184  | 76  | 69  |
| ENSMUSG00000005716 | Pvalb   | 19293  | 6   | 0   |
| ENSMUSG00000013974 | Mcemp1  | 69189  | 6   | 4   |
| ENSMUSG00000000632 | Sez6    | 20370  | 4   | 2   |
| ENSMUSG00000064065 | Ipcef1  | 320495 | 15  | 0   |
| ENSMUSG00000037405 | Icam1   | 15894  | 187 | 101 |
| ENSMUSG00000025582 | Nptx1   | 18164  | 6   | 30  |
| ENSMUSG00000028681 | Ptch2   | 19207  | 6   | 6   |
| ENSMUSG00000021803 | Cdhr1   | 170677 | 0   | 6   |
| ENSMUSG00000022208 | Jph4    | 319984 | 2   | 4   |
| ENSMUSG00000072596 | Ear2    | 13587  | 0   | 2   |
| ENSMUSG00000054641 | Mmrn1   | 70945  | 2   | 4   |
| ENSMUSG00000071424 | Grid2   | 14804  | 42  | 8   |
| ENSMUSG00000023391 | Dlx2    | 13392  | 2   | 0   |
| ENSMUSG00000001494 | Sost    | 74499  | 0   | 4   |
| ENSMUSG00000029075 | Tnfrsf4 | 22163  | 2   | 7   |
| ENSMUSG00000050473 | Slc35d3 | 76157  | 8   | 3   |
| ENSMUSG00000029254 | Stap1   | 56792  | 5   | 11  |
| ENSMUSG00000028039 | Efna3   | 13638  | 7   | 3   |
| ENSMUSG00000024245 | Tmem178 | 68027  | 3   | 4   |
| ENSMUSG00000040809 | Chil3   | 12655  | 21  | 14  |
| ENSMUSG00000054640 | Slc8a1  | 20541  | 23  | 15  |
| ENSMUSG00000042453 | Reln    | 19699  | 2   | 4   |
| ENSMUSG00000037446 | Tulp1   | 22157  | 2   | 2   |
| ENSMUSG00000032484 | Ngp     | 18054  | 8   | 32  |
| ENSMUSG00000062252 | Lhfpl5  | 328789 | 31  | 80  |

|                    |        |        |     |     |
|--------------------|--------|--------|-----|-----|
| ENSMUSG0000005763  | Cd247  | 12503  | 7   | 4   |
| ENSMUSG00000052212 | Cd177  | 68891  | 6   | 6   |
| ENSMUSG00000026117 | Zap70  | 22637  | 6   | 10  |
| ENSMUSG00000020704 | Asic2  | 11418  | 0   | 2   |
| ENSMUSG00000035373 | Ccl7   | 20306  | 12  | 2   |
| ENSMUSG00000009292 | Trpm2  | 28240  | 49  | 21  |
| ENSMUSG00000013921 | Clip3  | 76686  | 112 | 147 |
| ENSMUSG00000060961 | Slc4a4 | 54403  | 70  | 120 |
| ENSMUSG00000031845 | Bco1   | 63857  | 10  | 3   |
| ENSMUSG00000030827 | Fgf21  | 56636  | 8   | 2   |
| ENSMUSG00000020932 | Gfap   | 14580  | 1   | 11  |
| ENSMUSG00000020327 | Fgf22  | 67112  | 6   | 2   |
| ENSMUSG00000026418 | Tnni1  | 21952  | 2   | 1   |
| ENSMUSG00000095139 | Pou3f2 | 18992  | 0   | 8   |
| ENSMUSG00000040270 | Bach2  | 12014  | 65  | 44  |
| ENSMUSG00000058975 | Kcnc1  | 16502  | 4   | 0   |
| ENSMUSG00000004707 | Ly9    | 17085  | 79  | 12  |
| ENSMUSG00000029334 | Prkg2  | 19092  | 2   | 0   |
| ENSMUSG00000040026 | Saa3   | 20210  | 0   | 4   |
| ENSMUSG00000040592 | Cd79b  | 15985  | 9   | 4   |
| ENSMUSG00000028460 | Sit1   | 54390  | 4   | 0   |
| ENSMUSG00000079227 | Ccr5   | 12774  | 91  | 42  |
| ENSMUSG00000056978 | Hamp2  | 66438  | 4   | 0   |
| ENSMUSG00000028332 | Hemgn  | 93966  | 0   | 2   |
| ENSMUSG00000049723 | Mmp12  | 17381  | 15  | 2   |
| ENSMUSG00000028307 | Aldob  | 230163 | 10  | 4   |
| ENSMUSG00000020396 | Nefh   | 380684 | 21  | 10  |
| ENSMUSG00000078630 | Tomt   | 791260 | 170 | 131 |
| ENSMUSG00000034990 | Otoa   | 246190 | 643 | 295 |
| ENSMUSG00000036526 | Card11 | 108723 | 7   | 0   |
| ENSMUSG00000020798 | Spns3  | 77577  | 54  | 14  |
| ENSMUSG00000048583 | Igf2   | 16002  | 11  | 8   |
| ENSMUSG00000027120 | Fshb   | 14308  | 4   | 8   |
| ENSMUSG00000001506 | Col1a1 | 12842  | 15  | 22  |
| ENSMUSG00000048482 | Bdnf   | 12064  | 4   | 8   |
| ENSMUSG00000025515 | Muc2   | 17831  | 2   | 14  |
| ENSMUSG00000027077 | Smtnl1 | 68678  | 6   | 16  |
| ENSMUSG00000019122 | Ccl9   | 20308  | 20  | 0   |
| ENSMUSG00000000982 | Ccl3   | 20302  | 4   | 20  |
| ENSMUSG00000074934 | Grem1  | 23892  | 10  | 0   |

**Table S5. DEGs detected using RNAdeNoise filter Raw on data from [Dufek1 et al., 2021].**

| geneID<br>(Authors) | logFC    | logCPM   | PValue   | FDR      | EnsID              | raw counts<br>SRR11206238 | raw counts<br>SRR11206239 |
|---------------------|----------|----------|----------|----------|--------------------|---------------------------|---------------------------|
| 14608               | -9.10996 | -0.32095 | 3.94E-16 | 1.07E-11 | ENSMUSG00000031932 | 91                        | 16                        |
| 100039801           | -2.52481 | 1.323507 | 9.44E-15 | 1.28E-10 | ENSMUSG00000061974 | 233                       | 46                        |
| 73010               | -8.90966 | -0.50582 | 2.54E-14 | 1.72E-10 | ENSMUSG00000044067 | 81                        | 10                        |
| 57394               | -8.90966 | -0.50582 | 2.54E-14 | 1.72E-10 | ENSMUSG00000015401 | 81                        | 14                        |
| 17085               | -8.86603 | -0.54588 | 6.55E-14 | 3.56E-10 | ENSMUSG00000004707 | 79                        | 12                        |
| 64176               | -3.28293 | 0.308398 | 1.09E-13 | 4.96E-10 | ENSMUSG00000053025 | 126                       | 25                        |
| 67412               | 8.767546 | -0.76523 | 1.49E-13 | 5.80E-10 | ENSMUSG00000038916 | 12                        | 64                        |
| 64293               | -8.75081 | -0.65134 | 4.48E-13 | 1.51E-09 | ENSMUSG00000029123 | 74                        | 15                        |
| 170743              | -5.55767 | -0.5027  | 5.01E-13 | 1.51E-09 | ENSMUSG00000044583 | 80                        | 17                        |
| 15891               | -2.09616 | 1.633917 | 1.45E-12 | 3.93E-09 | ENSMUSG00000029306 | 274                       | 64                        |
| 12395               | -3.96435 | -0.1779  | 3.11E-12 | 7.21E-09 | ENSMUSG00000006586 | 95                        | 20                        |
| 15233               | -8.65151 | -0.74178 | 3.18E-12 | 7.21E-09 | ENSMUSG00000022821 | 70                        | 14                        |
| 224129              | -4.63123 | -0.48003 | 4.21E-12 | 8.79E-09 | ENSMUSG00000022840 | 80                        | 18                        |
| 504186              | 3.436205 | -0.30109 | 7.35E-12 | 1.43E-08 | ENSMUSG00000066279 | 21                        | 77                        |
| 272714              | -8.59918 | -0.78928 | 8.60E-12 | 1.56E-08 | NA                 | 68                        | 16                        |
| 140476              | 8.431382 | -1.0841  | 2.80E-11 | 4.75E-08 | ENSMUSG00000033498 | 7                         | 54                        |
| 14275               | -3.11952 | 0.008896 | 3.49E-11 | 5.58E-08 | ENSMUSG00000001827 | 103                       | 24                        |
| 22139               | -1.64775 | 2.525295 | 6.95E-11 | 1.02E-07 | ENSMUSG00000061808 | 470                       | 131                       |
| 74075               | -2.71869 | 0.32798  | 7.14E-11 | 1.02E-07 | ENSMUSG00000025480 | 123                       | 29                        |
| 72432               | -1.52831 | 3.283347 | 8.07E-11 | 1.07E-07 | ENSMUSG00000055561 | 773                       | 224                       |
| 270162              | 8.353611 | -1.15697 | 8.24E-11 | 1.07E-07 | ENSMUSG00000041986 | 4                         | 52                        |
| 214593              | -8.23767 | -1.11394 | 1.42E-10 | 1.76E-07 | ENSMUSG00000068452 | 56                        | 15                        |
| 329152              | -3.05328 | -0.04737 | 1.49E-10 | 1.76E-07 | ENSMUSG00000042807 | 99                        | 24                        |
| 15013               | -8.39943 | -0.96944 | 1.79E-10 | 2.03E-07 | ENSMUSG00000091705 | 61                        | 16                        |
| 271970              | -2.06213 | 1.122488 | 1.98E-10 | 2.16E-07 | ENSMUSG00000046561 | 194                       | 50                        |
| 12919               | -1.3046  | 7.937707 | 4.02E-10 | 3.62E-07 | ENSMUSG00000021680 | 18454                     | 5919                      |
| 23972               | -2.06951 | 0.999302 | 4.03E-10 | 3.62E-07 | ENSMUSG00000024899 | 179                       | 47                        |
| 77577               | -8.16752 | -1.17619 | 4.27E-10 | 3.62E-07 | ENSMUSG00000020798 | 54                        | 14                        |
| 70821               | -8.16752 | -1.17619 | 4.27E-10 | 3.62E-07 | ENSMUSG00000029828 | 54                        | 16                        |
| 319998              | -8.13112 | -1.20839 | 4.27E-10 | 3.62E-07 | ENSMUSG00000051703 | 53                        | 16                        |
| 67516               | -8.13112 | -1.20839 | 4.27E-10 | 3.62E-07 | ENSMUSG00000046523 | 53                        | 8                         |
| 74016               | -8.13112 | -1.20839 | 4.27E-10 | 3.62E-07 | ENSMUSG00000026873 | 53                        | 14                        |
| 791357              | -8.33689 | -1.02547 | 5.04E-10 | 4.15E-07 | NA                 | 59                        | 4                         |
| 20698               | -1.91005 | 1.299459 | 6.21E-10 | 4.96E-07 | ENSMUSG00000061878 | 214                       | 58                        |
| 71145               | -8.09378 | -1.24134 | 7.43E-10 | 5.46E-07 | ENSMUSG00000022032 | 52                        | 13                        |
| 212517              | -8.09378 | -1.24134 | 7.43E-10 | 5.46E-07 | ENSMUSG00000071550 | 52                        | 9                         |
| 245537              | -8.09378 | -1.24134 | 7.43E-10 | 5.46E-07 | ENSMUSG00000031302 | 52                        | 14                        |
| 109889              | -8.30457 | -1.05434 | 8.47E-10 | 5.75E-07 | ENSMUSG00000030380 | 58                        | 10                        |
| 12931               | -8.30457 | -1.05434 | 8.47E-10 | 5.75E-07 | ENSMUSG00000007888 | 58                        | 9                         |
| 234673              | -8.30457 | -1.05434 | 8.47E-10 | 5.75E-07 | ENSMUSG00000031886 | 58                        | 10                        |
| 216049              | 8.138594 | -1.35646 | 1.30E-09 | 8.20E-07 | ENSMUSG00000037855 | 11                        | 47                        |
| 23794               | -8.05545 | -1.27509 | 1.30E-09 | 8.20E-07 | ENSMUSG00000022894 | 51                        | 12                        |
| 665180              | -8.05545 | -1.27509 | 1.30E-09 | 8.20E-07 | ENSMUSG00000079598 | 51                        | 2                         |

|           |          |          |          |          |                    |     |     |
|-----------|----------|----------|----------|----------|--------------------|-----|-----|
| 636791    | -3.83515 | -0.6634  | 1.49E-09 | 9.22E-07 | ENSMUSG00000094002 | 70  | 19  |
| 100038696 | -4.28809 | -0.78228 | 1.70E-09 | 1.03E-06 | NA                 | 66  | 18  |
| 71603     | -8.01607 | -1.30967 | 2.27E-09 | 1.34E-06 | NA                 | 50  | 10  |
| 14089     | -1.64905 | 1.779608 | 3.31E-09 | 1.91E-06 | ENSMUSG00000000392 | 284 | 84  |
| 212032    | -7.97559 | -1.34513 | 3.99E-09 | 2.22E-06 | ENSMUSG00000025877 | 49  | 11  |
| 319405    | -7.97559 | -1.34513 | 3.99E-09 | 2.22E-06 | ENSMUSG00000097466 | 49  | 10  |
| 12308     | -4.23166 | -0.83131 | 4.38E-09 | 2.38E-06 | ENSMUSG00000003657 | 64  | 18  |
| 18191     | -3.45844 | -0.6165  | 4.53E-09 | 2.42E-06 | ENSMUSG00000066392 | 71  | 20  |
| 269109    | -1.86154 | 1.12165  | 4.68E-09 | 2.45E-06 | ENSMUSG00000036815 | 189 | 54  |
| 19739     | -7.93394 | -1.38151 | 7.04E-09 | 3.24E-06 | ENSMUSG00000020599 | 48  | 12  |
| 50720     | -7.93394 | -1.38151 | 7.04E-09 | 3.24E-06 | ENSMUSG00000048279 | 48  | 10  |
| 14805     | -7.93394 | -1.38151 | 7.04E-09 | 3.24E-06 | ENSMUSG00000022935 | 48  | 16  |
| 110751    | -7.93394 | -1.38151 | 7.04E-09 | 3.24E-06 | ENSMUSG00000027318 | 48  | 13  |
| 78004     | -7.93394 | -1.38151 | 7.04E-09 | 3.24E-06 | ENSMUSG00000045725 | 48  | 14  |
| 232975    | -7.93394 | -1.38151 | 7.04E-09 | 3.24E-06 | ENSMUSG00000040907 | 48  | 14  |
| 12768     | -7.93394 | -1.38151 | 7.04E-09 | 3.24E-06 | ENSMUSG00000025804 | 48  | 8   |
| 72668     | -2.29724 | 0.266769 | 1.14E-08 | 5.15E-06 | ENSMUSG00000054074 | 114 | 32  |
| 94227     | -7.89105 | -1.41886 | 1.25E-08 | 5.46E-06 | ENSMUSG00000067780 | 47  | 15  |
| 11634     | -7.89105 | -1.41886 | 1.25E-08 | 5.46E-06 | ENSMUSG00000000731 | 47  | 12  |
| 574418    | -2.94281 | -0.31818 | 1.29E-08 | 5.55E-06 | ENSMUSG00000046110 | 83  | 23  |
| 100503338 | 2.998248 | -0.67917 | 1.69E-08 | 7.19E-06 | NA                 | 21  | 61  |
| 640524    | 3.541323 | -0.96395 | 1.84E-08 | 7.69E-06 | ENSMUSG00000074899 | 18  | 54  |
| 56839     | -4.90733 | -1.07991 | 2.11E-08 | 8.47E-06 | ENSMUSG00000067242 | 56  | 17  |
| 75563     | -7.84685 | -1.45724 | 2.21E-08 | 8.47E-06 | ENSMUSG00000042707 | 46  | 11  |
| 75369     | -7.84685 | -1.45724 | 2.21E-08 | 8.47E-06 | ENSMUSG00000105773 | 46  | 5   |
| 11690     | -7.84685 | -1.45724 | 2.21E-08 | 8.47E-06 | ENSMUSG00000060063 | 46  | 14  |
| 381917    | -7.84685 | -1.45724 | 2.21E-08 | 8.47E-06 | ENSMUSG00000052273 | 46  | 16  |
| 213438    | -7.84685 | -1.45724 | 2.21E-08 | 8.47E-06 | ENSMUSG00000054293 | 46  | 8   |
| 269959    | 1.996646 | 0.526124 | 2.56E-08 | 9.66E-06 | ENSMUSG00000070469 | 44  | 111 |
| 229933    | -1.72291 | 1.221476 | 2.60E-08 | 9.66E-06 | ENSMUSG00000036960 | 198 | 60  |
| 22029     | -3.35373 | -0.70502 | 2.63E-08 | 9.66E-06 | ENSMUSG00000026875 | 67  | 20  |
| 329252    | -4.87268 | -1.10999 | 3.50E-08 | 1.27E-05 | ENSMUSG00000042793 | 55  | 17  |
| 57746     | 7.885821 | -1.58671 | 3.94E-08 | 1.36E-05 | ENSMUSG00000033644 | 13  | 42  |
| 239845    | 7.885821 | -1.58671 | 3.94E-08 | 1.36E-05 | ENSMUSG00000046961 | 12  | 42  |
| 16819     | -7.80124 | -1.49671 | 3.94E-08 | 1.36E-05 | ENSMUSG00000026822 | 45  | 13  |
| 102680    | -7.80124 | -1.49671 | 3.94E-08 | 1.36E-05 | ENSMUSG00000036814 | 45  | 6   |
| 320100    | -3.32633 | -0.72806 | 4.09E-08 | 1.39E-05 | ENSMUSG00000008318 | 66  | 20  |
| 14063     | -2.0166  | 0.482189 | 5.64E-08 | 1.89E-05 | ENSMUSG00000021678 | 127 | 38  |
| 80979     | 1.87484  | 0.566895 | 7.00E-08 | 2.28E-05 | ENSMUSG00000029015 | 47  | 112 |
| 105975    | -7.75415 | -1.53732 | 7.04E-08 | 2.28E-05 | ENSMUSG00000097209 | 44  | 8   |
| 67666     | -7.75415 | -1.53732 | 7.04E-08 | 2.28E-05 | ENSMUSG00000030606 | 44  | 12  |
| 328789    | 2.241928 | -0.07867 | 7.31E-08 | 2.34E-05 | ENSMUSG00000062252 | 31  | 80  |
| 18973     | 3.229159 | -0.93553 | 9.20E-08 | 2.91E-05 | ENSMUSG00000007080 | 19  | 54  |
| 319776    | -1.36773 | 2.294565 | 9.88E-08 | 3.07E-05 | ENSMUSG00000048108 | 383 | 129 |
| 212190    | -3.2699  | -0.77529 | 9.94E-08 | 3.07E-05 | ENSMUSG00000043621 | 64  | 20  |
| 68144     | 2.776792 | -0.68268 | 1.01E-07 | 3.10E-05 | NA                 | 22  | 60  |
| 83395     | 7.770852 | -1.68973 | 1.26E-07 | 3.47E-05 | ENSMUSG00000038560 | 12  | 40  |
| 216166    | -7.70547 | -1.57915 | 1.26E-07 | 3.47E-05 | ENSMUSG00000035486 | 43  | 12  |

|           |          |          |          |                 |                     |       |      |
|-----------|----------|----------|----------|-----------------|---------------------|-------|------|
| 380977    | -7.70547 | -1.57915 | 1.26E-07 | 3.47E-05        | ENSMUSG00000097915  | 43    | 14   |
| 57276     | -7.70547 | -1.57915 | 1.26E-07 | 3.47E-05        | ENSMUSG00000001943  | 43    | 12   |
| 12442     | -7.70547 | -1.57915 | 1.26E-07 | 3.47E-05        | ENSMUSG000000032218 | 43    | 14   |
| 69352     | -7.6551  | -1.62227 | 1.26E-07 | 3.47E-05        | ENSMUSG00000040536  | 42    | 15   |
| 14804     | -7.6551  | -1.62227 | 1.26E-07 | 3.47E-05        | ENSMUSG00000071424  | 42    | 8    |
| 414069    | -7.6551  | -1.62227 | 1.26E-07 | 3.47E-05        | ENSMUSG00000078786  | 42    | 11   |
| 140919    | -7.6551  | -1.62227 | 1.26E-07 | 3.47E-05        | ENSMUSG00000030500  | 42    | 14   |
| 64011     | -7.6551  | -1.62227 | 1.26E-07 | 3.47E-05        | ENSMUSG00000053310  | 42    | 12   |
| 353130    | -2.00476 | 0.408945 | 1.46E-07 | 3.97E-05        | ENSMUSG00000049620  | 121   | 37   |
| 242022    | -1.40704 | 1.950973 | 1.49E-07 | 4.02E-05        | ENSMUSG00000037016  | 306   | 103  |
| 545192    | -3.24083 | -0.79952 | 1.55E-07 | 4.13E-05        | ENSMUSG00000047507  | 63    | 20   |
| 68169     | -2.45569 | -0.24193 | 1.91E-07 | 5.03E-05        | ENSMUSG00000049001  | 84    | 26   |
| 243277    | -2.29462 | -0.12563 | 2.00E-07 | 5.24E-05        | ENSMUSG00000044017  | 89    | 28   |
| 72293     | -1.85832 | 0.536649 | 2.10E-07 | 5.43E-05        | ENSMUSG00000021567  | 129   | 41   |
| 208890    | -1.22496 | 3.072065 | 2.18E-07 | 5.57E-05        | ENSMUSG00000040569  | 632   | 225  |
| 12007     | 7.709739 | -1.74403 | 2.27E-07 | 5.57E-05        | ENSMUSG00000037053  | 8     | 39   |
| 100503785 | -7.60289 | -1.66677 | 2.27E-07 | 5.57E-05        | NA                  | 41    | 10   |
| 15109     | -7.60289 | -1.66677 | 2.27E-07 | 5.57E-05        | ENSMUSG00000020017  | 41    | 15   |
| 68662     | -7.60289 | -1.66677 | 2.27E-07 | 5.57E-05        | ENSMUSG00000064057  | 41    | 8    |
| 214922    | -7.60289 | -1.66677 | 2.27E-07 | 5.57E-05        | ENSMUSG00000072572  | 41    | 7    |
| 20278     | -1.53874 | 1.34597  | 2.39E-07 | 5.79E-05        | ENSMUSG00000000216  | 209   | 69   |
| 75677     | -1.3903  | 1.905936 | 2.64E-07 | 6.35E-05        | ENSMUSG00000038064  | 296   | 101  |
| 225266    | -2.74161 | -0.48407 | 2.81E-07 | 6.70E-05        | ENSMUSG00000042514  | 74    | 23   |
| 327956    | -1.06514 | 7.18803  | 3.11E-07 | 7.35E-05        | ENSMUSG00000020830  | 10437 | 3955 |
| 170442    | -1.38969 | 1.801697 | 3.42E-07 | 8.01E-05        | ENSMUSG00000041660  | 276   | 95   |
| 15366     | 7.645922 | -1.80036 | 4.11E-07 | 9.08E-05        | ENSMUSG00000020330  | 11    | 38   |
| 100504211 | -7.54873 | -1.71274 | 4.11E-07 | 9.08E-05        | NA                  | 40    | 14   |
| 65256     | -7.54873 | -1.71274 | 4.11E-07 | 9.08E-05        | ENSMUSG00000021200  | 40    | 16   |
| 238690    | -7.54873 | -1.71274 | 4.11E-07 | 9.08E-05        | ENSMUSG00000055480  | 40    | 11   |
| 226245    | -7.54873 | -1.71274 | 4.11E-07 | 9.08E-05        | ENSMUSG00000035818  | 40    | 4    |
| 11444     | -7.54873 | -1.71274 | 4.11E-07 | 9.08E-05        | ENSMUSG00000027950  | 40    | 5    |
| 244694    | -7.54873 | -1.71274 | 4.11E-07 | 9.08E-05        | ENSMUSG00000053914  | 40    | 16   |
| 239096    | -2.23664 | -0.06351 | 5.31E-07 | 0.000116<br>353 | ENSMUSG00000059674  | 92    | 29   |
| 629059    | -2.80864 | -0.63151 | 6.97E-07 | 0.000151<br>535 | ENSMUSG00000035184  | 68    | 22   |
| 100504651 | -7.49246 | -1.76027 | 7.45E-07 | 0.000159<br>382 | NA                  | 39    | 16   |
| 56788     | -7.49246 | -1.76027 | 7.45E-07 | 0.000159<br>382 | ENSMUSG00000007279  | 39    | 6    |
| 23985     | -1.02845 | 6.755653 | 8.19E-07 | 0.000173<br>926 | ENSMUSG00000020651  | 7673  | 2985 |
| 320452    | -1.54821 | 1.091522 | 8.72E-07 | 0.000183<br>821 | ENSMUSG00000051048  | 177   | 60   |
| 14813     | -3.79867 | -1.2002  | 8.97E-07 | 0.000187<br>579 | ENSMUSG00000020734  | 51    | 18   |
| 20377     | -1.03657 | 5.485058 | 9.70E-07 | 0.000201<br>317 | ENSMUSG00000031548  | 3192  | 1241 |
| 66607     | 3.448895 | -1.41356 | 1.28E-06 | 0.000262<br>85  | ENSMUSG00000024678  | 17    | 43   |
| 435653    | 1.822543 | 0.191309 | 1.32E-06 | 0.000268<br>853 | ENSMUSG00000070524  | 40    | 89   |

|           |          |          |          |                 |                    |      |     |
|-----------|----------|----------|----------|-----------------|--------------------|------|-----|
| 100503685 | 7.509138 | -1.91978 | 1.36E-06 | 0.000268<br>853 | NA                 | 9    | 36  |
| 100502869 | -7.4339  | -1.80948 | 1.36E-06 | 0.000268<br>853 | NA                 | 38   | 4   |
| 654812    | -7.4339  | -1.80948 | 1.36E-06 | 0.000268<br>853 | ENSMUSG00000028989 | 38   | 14  |
| 12217     | -7.4339  | -1.80948 | 1.36E-06 | 0.000268<br>853 | ENSMUSG00000032589 | 38   | 12  |
| 12142     | -1.91115 | 0.125816 | 1.63E-06 | 0.000320<br>414 | ENSMUSG00000038151 | 100  | 34  |
| 12805     | -1.02112 | 4.99334  | 1.76E-06 | 0.000344<br>532 | ENSMUSG00000055022 | 2265 | 893 |
| 20450     | 1.896215 | 0.075125 | 2.02E-06 | 0.000391<br>199 | ENSMUSG00000025789 | 37   | 84  |
| 244071    | -1.71149 | 0.480084 | 2.05E-06 | 0.000394<br>709 | ENSMUSG00000025754 | 122  | 42  |
| 78771     | 1.963503 | -0.06887 | 2.11E-06 | 0.000404<br>35  | ENSMUSG00000021596 | 34   | 78  |
| 75568     | -4.5165  | -1.41447 | 2.15E-06 | 0.000408<br>178 | ENSMUSG00000039676 | 46   | 17  |
| 93726     | -2.7264  | -0.69824 | 2.32E-06 | 0.000437<br>208 | ENSMUSG00000047222 | 65   | 22  |
| 20745     | 1.619678 | 0.612046 | 2.35E-06 | 0.000440<br>359 | ENSMUSG00000056222 | 53   | 111 |
| 381284    | -7.37286 | -1.86049 | 2.48E-06 | 0.000451<br>499 | ENSMUSG00000084989 | 37   | 6   |
| 192190    | -7.37286 | -1.86049 | 2.48E-06 | 0.000451<br>499 | ENSMUSG00000038725 | 37   | 12  |
| 386454    | -7.37286 | -1.86049 | 2.48E-06 | 0.000451<br>499 | ENSMUSG00000036492 | 37   | 8   |
| 12661     | -7.37286 | -1.86049 | 2.48E-06 | 0.000451<br>499 | ENSMUSG00000030077 | 37   | 14  |
| 338368    | 1.548688 | 0.731063 | 2.60E-06 | 0.000471<br>864 | ENSMUSG00000049687 | 58   | 118 |
| 12447     | -2.05478 | -0.10526 | 2.89E-06 | 0.000519<br>307 | ENSMUSG0000002068  | 88   | 30  |
| 72500     | -1.52957 | 0.872863 | 2.90E-06 | 0.000519<br>307 | ENSMUSG00000089762 | 153  | 54  |
| 94111     | -2.98448 | -1.01015 | 3.55E-06 | 0.000631<br>034 | ENSMUSG00000053863 | 55   | 20  |
| 12560     | -1.7817  | 0.302562 | 3.72E-06 | 0.000651<br>71  | ENSMUSG00000061048 | 110  | 38  |
| 58869     | -1.59848 | 0.639926 | 3.87E-06 | 0.000673<br>73  | ENSMUSG00000027674 | 133  | 47  |
| 246049    | 1.674239 | 0.372893 | 4.00E-06 | 0.000691<br>879 | ENSMUSG00000020264 | 46   | 97  |
| 432628    | -1.67091 | 0.449916 | 4.25E-06 | 0.000725<br>827 | ENSMUSG00000037336 | 119  | 42  |
| 19734     | -1.65712 | 0.439714 | 4.25E-06 | 0.000725<br>827 | ENSMUSG00000026475 | 118  | 42  |
| 18190     | -7.30912 | -1.91344 | 4.54E-06 | 0.000761<br>323 | ENSMUSG00000033768 | 36   | 15  |
| 433700    | -7.30912 | -1.91344 | 4.54E-06 | 0.000761<br>323 | ENSMUSG00000066196 | 36   | 13  |
| 22116     | -7.30912 | -1.91344 | 4.54E-06 | 0.000761<br>323 | ENSMUSG00000059891 | 36   | 12  |
| 594844    | -1.61979 | 0.563146 | 4.66E-06 | 0.000776<br>716 | ENSMUSG00000044550 | 127  | 45  |
| 24131     | 3.708012 | -1.69978 | 4.81E-06 | 0.000797<br>471 | ENSMUSG00000021798 | 16   | 38  |
| 338346    | -4.42381 | -1.4922  | 6.10E-06 | 0.000999<br>344 | ENSMUSG00000053164 | 44   | 17  |
| 78547     | -4.42381 | -1.4922  | 6.10E-06 | 0.000999<br>344 | ENSMUSG00000044997 | 44   | 17  |



|           |          |          |          |                 |                    |     |     |
|-----------|----------|----------|----------|-----------------|--------------------|-----|-----|
| 269152    | -1.3129  | 1.404496 | 6.21E-06 | 0.001010<br>167 | ENSMUSG00000026494 | 209 | 78  |
| 14169     | -2.54635 | -0.84208 | 6.24E-06 | 0.001010<br>167 | ENSMUSG00000025551 | 59  | 22  |
| 13869     | -3.63427 | -1.33655 | 6.44E-06 | 0.001036<br>114 | ENSMUSG00000062209 | 47  | 18  |
| 100503002 | -2.20958 | -0.43633 | 6.58E-06 | 0.001052<br>604 | NA                 | 73  | 26  |
| 263803    | -1.29424 | 1.50083  | 6.95E-06 | 0.001104<br>693 | ENSMUSG00000026785 | 222 | 83  |
| 67503     | -2.37324 | -0.60342 | 7.29E-06 | 0.001152<br>417 | ENSMUSG00000103746 | 67  | 24  |
| 20379     | 1.867465 | -0.14144 | 7.35E-06 | 0.001154<br>313 | ENSMUSG00000021319 | 34  | 74  |
| 320046    | -2.70497 | -0.95069 | 7.46E-06 | 0.001164<br>998 | ENSMUSG00000052125 | 56  | 21  |
| 320064    | -1.54068 | 0.641726 | 7.57E-06 | 0.001175<br>045 | NA                 | 132 | 48  |
| 11941     | -1.01507 | 3.579308 | 7.63E-06 | 0.001178<br>635 | ENSMUSG00000030302 | 855 | 345 |
| 216454    | 7.27607  | -2.11884 | 8.35E-06 | 0.001194<br>614 | ENSMUSG00000074639 | 9   | 33  |
| 622124    | 7.27607  | -2.11884 | 8.35E-06 | 0.001194<br>614 | ENSMUSG00000104401 | 14  | 33  |
| 246177    | -7.24244 | -1.96848 | 8.35E-06 | 0.001194<br>614 | ENSMUSG00000020437 | 35  | 2   |
| 667631    | -7.24244 | -1.96848 | 8.35E-06 | 0.001194<br>614 | NA                 | 35  | 9   |
| 100504549 | -7.24244 | -1.96848 | 8.35E-06 | 0.001194<br>614 | NA                 | 35  | 15  |
| 219144    | -7.24244 | -1.96848 | 8.35E-06 | 0.001194<br>614 | ENSMUSG00000043157 | 35  | 14  |
| 415115    | -7.24244 | -1.96848 | 8.35E-06 | 0.001194<br>614 | ENSMUSG00000039873 | 35  | 16  |
| 58203     | -7.24244 | -1.96848 | 8.35E-06 | 0.001194<br>614 | ENSMUSG00000027514 | 35  | 13  |
| 76072     | -7.24244 | -1.96848 | 8.35E-06 | 0.001194<br>614 | ENSMUSG00000063851 | 35  | 8   |
| 208628    | -7.24244 | -1.96848 | 8.35E-06 | 0.001194<br>614 | ENSMUSG00000029414 | 35  | 5   |
| 100041450 | -7.24244 | -1.96848 | 8.35E-06 | 0.001194<br>614 | NA                 | 35  | 14  |
| 18752     | -7.24244 | -1.96848 | 8.35E-06 | 0.001194<br>614 | ENSMUSG00000078816 | 35  | 11  |
| 78052     | -7.24244 | -1.96848 | 8.35E-06 | 0.001194<br>614 | ENSMUSG00000013091 | 35  | 12  |
| 73619     | -7.24244 | -1.96848 | 8.35E-06 | 0.001194<br>614 | NA                 | 35  | 11  |
| 55983     | -1.27329 | 1.486141 | 9.20E-06 | 0.001308<br>453 | ENSMUSG00000035357 | 219 | 83  |
| 11808     | -1.0469  | 2.936337 | 9.48E-06 | 0.001341<br>291 | ENSMUSG00000032080 | 555 | 223 |
| 21940     | -4.37513 | -1.53276 | 1.03E-05 | 0.001451<br>825 | ENSMUSG00000030336 | 43  | 17  |
| 68162     | -1.43941 | 0.843924 | 1.16E-05 | 0.001612<br>979 | NA                 | 148 | 55  |
| 77974     | 1.505371 | 0.564984 | 1.16E-05 | 0.001612<br>979 | ENSMUSG00000021123 | 54  | 106 |
| 227580    | -1.23818 | 1.543576 | 1.16E-05 | 0.001612<br>979 | ENSMUSG00000049630 | 226 | 87  |
| 234857    | -1.45986 | 0.70782  | 1.17E-05 | 0.001612<br>979 | ENSMUSG00000010154 | 136 | 51  |
| 232785    | -1.20812 | 1.67379  | 1.20E-05 | 0.001652<br>729 | ENSMUSG00000072653 | 245 | 95  |

|           |          |          |          |                 |                    |     |     |
|-----------|----------|----------|----------|-----------------|--------------------|-----|-----|
| 330941    | 1.29518  | 1.210631 | 1.23E-05 | 0.001682<br>882 | ENSMUSG00000078307 | 84  | 152 |
| 71724     | 2.186982 | -0.72051 | 1.35E-05 | 0.001831<br>346 | ENSMUSG00000064294 | 25  | 56  |
| 238988    | -2.31789 | -0.64674 | 1.54E-05 | 0.001977<br>971 | ENSMUSG00000040640 | 65  | 24  |
| 330277    | 2.133159 | -0.64349 | 1.54E-05 | 0.001977<br>971 | ENSMUSG00000039742 | 26  | 58  |
| 108760    | -7.17253 | -2.02578 | 1.54E-05 | 0.001977<br>971 | ENSMUSG00000021130 | 34  | 0   |
| 18095     | -7.17253 | -2.02578 | 1.54E-05 | 0.001977<br>971 | ENSMUSG00000022061 | 34  | 14  |
| 210573    | -7.17253 | -2.02578 | 1.54E-05 | 0.001977<br>971 | ENSMUSG00000096847 | 34  | 16  |
| 100504187 | -7.17253 | -2.02578 | 1.54E-05 | 0.001977<br>971 | NA                 | 34  | 8   |
| 64406     | -7.17253 | -2.02578 | 1.54E-05 | 0.001977<br>971 | ENSMUSG00000075304 | 34  | 6   |
| 384214    | -7.17253 | -2.02578 | 1.54E-05 | 0.001977<br>971 | ENSMUSG00000033805 | 34  | 7   |
| 109163    | -7.17253 | -2.02578 | 1.54E-05 | 0.001977<br>971 | ENSMUSG00000085355 | 34  | 14  |
| 11814     | -7.17253 | -2.02578 | 1.54E-05 | 0.001977<br>971 | ENSMUSG00000032081 | 34  | 14  |
| 74100     | -7.17253 | -2.02578 | 1.54E-05 | 0.001977<br>971 | ENSMUSG00000032503 | 34  | 9   |
| 30878     | -7.17253 | -2.02578 | 1.54E-05 | 0.001977<br>971 | ENSMUSG00000037010 | 34  | 12  |
| 72804     | -3.11757 | -1.26252 | 1.58E-05 | 0.002015<br>205 | NA                 | 48  | 19  |
| 100503922 | -3.54446 | -1.41007 | 1.73E-05 | 0.002182<br>21  | NA                 | 45  | 18  |
| 667373    | -3.54446 | -1.41007 | 1.73E-05 | 0.002182<br>21  | ENSMUSG00000079339 | 45  | 18  |
| 18682     | -3.54446 | -1.41007 | 1.73E-05 | 0.002182<br>21  | ENSMUSG00000025537 | 45  | 18  |
| 20717     | -4.32475 | -1.57453 | 1.74E-05 | 0.002183<br>468 | ENSMUSG00000079012 | 42  | 17  |
| 18793     | -1.51914 | 0.536599 | 1.81E-05 | 0.002255<br>621 | ENSMUSG00000046223 | 123 | 46  |
| 100126229 | 1.790993 | -0.19828 | 1.86E-05 | 0.002310<br>137 | ENSMUSG00000085105 | 34  | 71  |
| 53814     | -2.79753 | -1.16001 | 2.14E-05 | 0.002646<br>205 | ENSMUSG00000028141 | 50  | 20  |
| 320798    | -1.97337 | -0.37464 | 2.19E-05 | 0.002697<br>783 | NA                 | 74  | 28  |
| 75019     | 1.613977 | 0.141382 | 2.23E-05 | 0.002724<br>953 | ENSMUSG00000021872 | 42  | 84  |
| 23886     | -1.36746 | 0.862461 | 2.44E-05 | 0.002973<br>498 | ENSMUSG00000038508 | 148 | 57  |
| 319336    | -3.07468 | -1.29696 | 2.53E-05 | 0.003061<br>251 | NA                 | 47  | 19  |
| 13417     | -1.9117  | -0.21447 | 2.53E-05 | 0.003061<br>251 | ENSMUSG00000033826 | 81  | 30  |
| 232370    | -1.10839 | 1.981838 | 2.60E-05 | 0.003122<br>404 | ENSMUSG00000008153 | 295 | 119 |
| 17175     | -2.59842 | -1.03499 | 2.71E-05 | 0.003174<br>414 | ENSMUSG00000028979 | 53  | 21  |
| 100038371 | 7.189189 | -2.19152 | 2.86E-05 | 0.003174<br>414 | NA                 | 11  | 32  |
| 118452    | 7.189189 | -2.19152 | 2.86E-05 | 0.003174<br>414 | ENSMUSG00000022296 | 12  | 32  |
| 27412     | 7.189189 | -2.19152 | 2.86E-05 | 0.003174<br>414 | ENSMUSG00000070526 | 4   | 32  |

|           |          |          |          |                 |                     |     |     |
|-----------|----------|----------|----------|-----------------|---------------------|-----|-----|
| 18054     | 7.189189 | -2.19152 | 2.86E-05 | 0.003174<br>414 | ENSMUSG00000032484  | 8   | 32  |
| 78185     | 7.189189 | -2.19152 | 2.86E-05 | 0.003174<br>414 | ENSMUSG00000039545  | 8   | 32  |
| 76184     | -7.09905 | -2.08554 | 2.86E-05 | 0.003174<br>414 | ENSMUSG00000044749  | 33  | 4   |
| 27386     | -7.09905 | -2.08554 | 2.86E-05 | 0.003174<br>414 | ENSMUSG00000021010  | 33  | 10  |
| 100504637 | -7.09905 | -2.08554 | 2.86E-05 | 0.003174<br>414 | ENSMUSG000000100199 | 33  | 6   |
| 67849     | -7.09905 | -2.08554 | 2.86E-05 | 0.003174<br>414 | ENSMUSG00000024791  | 33  | 12  |
| 227717    | -7.09905 | -2.08554 | 2.86E-05 | 0.003174<br>414 | ENSMUSG00000043102  | 33  | 12  |
| 100504361 | -7.09905 | -2.08554 | 2.86E-05 | 0.003174<br>414 | NA                  | 33  | 11  |
| 12561     | -7.09905 | -2.08554 | 2.86E-05 | 0.003174<br>414 | ENSMUSG00000000305  | 33  | 6   |
| 215090    | -7.09905 | -2.08554 | 2.86E-05 | 0.003174<br>414 | ENSMUSG00000042763  | 33  | 16  |
| 329973    | -7.09905 | -2.08554 | 2.86E-05 | 0.003174<br>414 | NA                  | 33  | 4   |
| 78263     | -7.09905 | -2.08554 | 2.86E-05 | 0.003174<br>414 | NA                  | 33  | 11  |
| 69665     | -7.09905 | -2.08554 | 2.86E-05 | 0.003174<br>414 | ENSMUSG00000006143  | 33  | 14  |
| 434341    | -7.09905 | -2.08554 | 2.86E-05 | 0.003174<br>414 | ENSMUSG00000074151  | 33  | 11  |
| 26927     | -7.09905 | -2.08554 | 2.86E-05 | 0.003174<br>414 | ENSMUSG00000050397  | 33  | 12  |
| 170758    | -1.5418  | 0.355321 | 2.92E-05 | 0.003220<br>997 | ENSMUSG00000018012  | 110 | 42  |
| 12291     | -4.21839 | -1.66202 | 2.95E-05 | 0.003233<br>831 | ENSMUSG00000020866  | 40  | 17  |
| 665610    | -4.21839 | -1.66202 | 2.95E-05 | 0.003233<br>831 | NA                  | 40  | 17  |
| 71818     | -2.41249 | -0.94694 | 3.27E-05 | 0.003569<br>582 | ENSMUSG000000113434 | 55  | 22  |
| 103098    | -1.10735 | 1.866275 | 3.34E-05 | 0.003633<br>373 | ENSMUSG00000019894  | 273 | 111 |
| 195727    | -2.75705 | -1.19202 | 3.36E-05 | 0.003633<br>373 | ENSMUSG00000059493  | 49  | 20  |
| 73902     | 1.578863 | 0.065226 | 3.77E-05 | 0.004070<br>391 | ENSMUSG00000072423  | 41  | 80  |
| 58243     | -3.03048 | -1.33226 | 4.05E-05 | 0.004330<br>684 | ENSMUSG00000055430  | 46  | 19  |
| 105833    | 2.683599 | -1.37913 | 4.05E-05 | 0.004330<br>684 | ENSMUSG00000003354  | 19  | 42  |
| 66968     | 2.462184 | -1.11302 | 4.17E-05 | 0.004444<br>83  | ENSMUSG00000011305  | 21  | 47  |
| 381306    | 1.243778 | 1.047619 | 4.22E-05 | 0.004483<br>749 | ENSMUSG00000041406  | 78  | 136 |
| 382384    | -1.29555 | 0.972774 | 4.51E-05 | 0.004749<br>252 | ENSMUSG00000035963  | 157 | 62  |
| 320277    | -3.97878 | -1.85546 | 4.58E-05 | 0.004786<br>754 | ENSMUSG00000072663  | 36  | 17  |
| 67580     | 3.420105 | -1.93046 | 4.58E-05 | 0.004786<br>754 | ENSMUSG00000041673  | 16  | 34  |
| 668041    | -3.44869 | -1.48769 | 4.68E-05 | 0.004843<br>444 | NA                  | 43  | 18  |
| 100503912 | -3.44869 | -1.48769 | 4.68E-05 | 0.004843<br>444 | NA                  | 43  | 18  |
| 320878    | -1.52109 | 0.286354 | 4.75E-05 | 0.004843<br>444 | ENSMUSG00000038244  | 105 | 41  |

|           |          |          |          |                 |                    |     |     |
|-----------|----------|----------|----------|-----------------|--------------------|-----|-----|
| 73989     | -1.01262 | 2.384755 | 4.93E-05 | 0.004843<br>444 | ENSMUSG00000115422 | 379 | 159 |
| 68659     | -1.61941 | 0.051981 | 4.94E-05 | 0.004843<br>444 | ENSMUSG00000027955 | 92  | 36  |
| 72184     | -1.61941 | 0.051981 | 4.94E-05 | 0.004843<br>444 | ENSMUSG00000035298 | 92  | 36  |
| 100504639 | -4.16211 | -1.70792 | 5.00E-05 | 0.004843<br>444 | NA                 | 39  | 17  |
| 14561     | -2.71539 | -1.22478 | 5.25E-05 | 0.004843<br>444 | ENSMUSG00000025352 | 48  | 20  |
| 212712    | -7.02164 | -2.14798 | 5.33E-05 | 0.004843<br>444 | ENSMUSG00000038331 | 32  | 10  |
| 19886     | -7.02164 | -2.14798 | 5.33E-05 | 0.004843<br>444 | ENSMUSG00000019893 | 32  | 2   |
| 17001     | -7.02164 | -2.14798 | 5.33E-05 | 0.004843<br>444 | ENSMUSG00000020377 | 32  | 12  |
| 12569     | -7.02164 | -2.14798 | 5.33E-05 | 0.004843<br>444 | ENSMUSG00000048895 | 32  | 10  |
| 214321    | -7.02164 | -2.14798 | 5.33E-05 | 0.004843<br>444 | ENSMUSG00000072974 | 32  | 8   |
| 13488     | -7.02164 | -2.14798 | 5.33E-05 | 0.004843<br>444 | ENSMUSG00000021478 | 32  | 8   |
| 380930    | -7.02164 | -2.14798 | 5.33E-05 | 0.004843<br>444 | ENSMUSG00000115149 | 32  | 13  |
| 116838    | -7.02164 | -2.14798 | 5.33E-05 | 0.004843<br>444 | ENSMUSG00000037386 | 32  | 13  |
| 100503680 | -7.02164 | -2.14798 | 5.33E-05 | 0.004843<br>444 | NA                 | 32  | 10  |
| 12448     | -7.02164 | -2.14798 | 5.33E-05 | 0.004843<br>444 | ENSMUSG00000028212 | 32  | 13  |
| 14191     | -7.02164 | -2.14798 | 5.33E-05 | 0.004843<br>444 | ENSMUSG00000028874 | 32  | 12  |
| 71176     | -7.02164 | -2.14798 | 5.33E-05 | 0.004843<br>444 | ENSMUSG00000089984 | 32  | 16  |
| 21789     | -7.02164 | -2.14798 | 5.33E-05 | 0.004843<br>444 | ENSMUSG00000029664 | 32  | 4   |
| 100503974 | -7.02164 | -2.14798 | 5.33E-05 | 0.004843<br>444 | NA                 | 32  | 12  |
| 80720     | -7.02164 | -2.14798 | 5.33E-05 | 0.004843<br>444 | ENSMUSG00000031860 | 32  | 12  |
| 102920    | -7.02164 | -2.14798 | 5.33E-05 | 0.004843<br>444 | ENSMUSG00000031262 | 32  | 8   |
| 71860     | -6.93983 | -2.21335 | 5.33E-05 | 0.004843<br>444 | ENSMUSG00000020904 | 31  | 7   |
| 432396    | -6.93983 | -2.21335 | 5.33E-05 | 0.004843<br>444 | ENSMUSG00000086191 | 31  | 6   |
| 100862206 | -6.93983 | -2.21335 | 5.33E-05 | 0.004843<br>444 | ENSMUSG00000113280 | 31  | 14  |
| 100504566 | -6.93983 | -2.21335 | 5.33E-05 | 0.004843<br>444 | NA                 | 31  | 7   |
| 271278    | -6.93983 | -2.21335 | 5.33E-05 | 0.004843<br>444 | ENSMUSG00000044361 | 31  | 16  |
| 100502943 | -6.93983 | -2.21335 | 5.33E-05 | 0.004843<br>444 | NA                 | 31  | 12  |
| 329078    | -6.93983 | -2.21335 | 5.33E-05 | 0.004843<br>444 | ENSMUSG00000087095 | 31  | 13  |
| 14810     | -6.93983 | -2.21335 | 5.33E-05 | 0.004843<br>444 | ENSMUSG00000026959 | 31  | 10  |
| 12386     | -6.93983 | -2.21335 | 5.33E-05 | 0.004843<br>444 | ENSMUSG00000063063 | 31  | 13  |
| 232966    | -6.93983 | -2.21335 | 5.33E-05 | 0.004843<br>444 | ENSMUSG00000068962 | 31  | 12  |
| 243897    | -6.93983 | -2.21335 | 5.33E-05 | 0.004843<br>444 | ENSMUSG00000031493 | 31  | 8   |

|           |          |          |          |                 |                    |     |     |
|-----------|----------|----------|----------|-----------------|--------------------|-----|-----|
| 11937     | -6.93983 | -2.21335 | 5.33E-05 | 0.004843<br>444 | ENSMUSG00000030730 | 31  | 16  |
| 11604     | -6.93983 | -2.21335 | 5.33E-05 | 0.004843<br>444 | ENSMUSG00000005705 | 31  | 4   |
| 245446    | -6.93983 | -2.21335 | 5.33E-05 | 0.004843<br>444 | ENSMUSG00000046699 | 31  | 2   |
| 80903     | -6.93983 | -2.21335 | 5.33E-05 | 0.004843<br>444 | ENSMUSG00000031230 | 31  | 2   |
| 76257     | -1.235   | 1.075288 | 5.62E-05 | 0.005092<br>847 | ENSMUSG00000010064 | 166 | 67  |
| 13123     | -1.4725  | 0.357414 | 5.85E-05 | 0.005284<br>496 | ENSMUSG00000039519 | 109 | 43  |
| 64085     | -1.50517 | 0.274892 | 6.04E-05 | 0.005438<br>057 | ENSMUSG00000032452 | 104 | 41  |
| 654318    | 1.106598 | 1.561708 | 6.64E-05 | 0.005957<br>632 | ENSMUSG00000085408 | 112 | 183 |
| 76670     | -1.4235  | 0.467958 | 6.78E-05 | 0.006060<br>251 | ENSMUSG00000039543 | 116 | 46  |
| 16669     | -1.01096 | 2.258667 | 7.26E-05 | 0.006469<br>395 | ENSMUSG00000020911 | 348 | 147 |
| 224419    | 2.318713 | -1.04685 | 7.46E-05 | 0.006623<br>612 | ENSMUSG00000025610 | 22  | 48  |
| 100502619 | -3.34611 | -1.5699  | 7.68E-05 | 0.006781<br>059 | NA                 | 41  | 18  |
| 628870    | -1.01323 | 2.147043 | 7.68E-05 | 0.006781<br>059 | ENSMUSG00000091455 | 323 | 137 |
| 320004    | -3.9121  | -1.90834 | 8.08E-05 | 0.007107<br>383 | NA                 | 35  | 17  |
| 246133    | -1.2165  | 1.08976  | 8.66E-05 | 0.007588<br>477 | ENSMUSG00000039672 | 167 | 68  |
| 12506     | -1.09791 | 1.59843  | 8.72E-05 | 0.007624<br>637 | ENSMUSG00000015355 | 228 | 95  |
| 74665     | 1.024119 | 1.943442 | 8.83E-05 | 0.007692<br>283 | ENSMUSG00000056598 | 147 | 230 |
| 52882     | -2.26231 | -0.86394 | 9.19E-05 | 0.007983<br>533 | ENSMUSG00000021719 | 57  | 23  |
| 28240     | -2.44289 | -1.15596 | 9.83E-05 | 0.008204<br>501 | ENSMUSG00000009292 | 49  | 21  |
| 215456    | 1.248955 | 0.729089 | 9.84E-05 | 0.008204<br>501 | ENSMUSG00000046338 | 65  | 112 |
| 213043    | -6.8531  | -2.28194 | 9.96E-05 | 0.008204<br>501 | ENSMUSG00000079554 | 30  | 12  |
| 16524     | -6.8531  | -2.28194 | 9.96E-05 | 0.008204<br>501 | ENSMUSG00000038026 | 30  | 7   |
| 16545     | -6.8531  | -2.28194 | 9.96E-05 | 0.008204<br>501 | ENSMUSG00000019932 | 30  | 16  |
| 432530    | -6.8531  | -2.28194 | 9.96E-05 | 0.008204<br>501 | ENSMUSG00000020431 | 30  | 6   |
| 217143    | -6.8531  | -2.28194 | 9.96E-05 | 0.008204<br>501 | ENSMUSG00000070337 | 30  | 16  |
| 21819     | -6.8531  | -2.28194 | 9.96E-05 | 0.008204<br>501 | ENSMUSG00000053469 | 30  | 10  |
| 29870     | -6.8531  | -2.28194 | 9.96E-05 | 0.008204<br>501 | ENSMUSG00000022385 | 30  | 8   |
| 668225    | -6.8531  | -2.28194 | 9.96E-05 | 0.008204<br>501 | ENSMUSG00000095440 | 30  | 16  |
| 68230     | -6.8531  | -2.28194 | 9.96E-05 | 0.008204<br>501 | ENSMUSG00000116852 | 30  | 12  |
| 332396    | -6.8531  | -2.28194 | 9.96E-05 | 0.008204<br>501 | ENSMUSG00000040901 | 30  | 2   |
| 623781    | -6.8531  | -2.28194 | 9.96E-05 | 0.008204<br>501 | ENSMUSG00000055926 | 30  | 11  |
| 18389     | -6.8531  | -2.28194 | 9.96E-05 | 0.008204<br>501 | ENSMUSG00000027584 | 30  | 12  |

|       |         |          |          |                 |                    |    |    |
|-------|---------|----------|----------|-----------------|--------------------|----|----|
| 11489 | -6.8531 | -2.28194 | 9.96E-05 | 0.008204<br>501 | ENSMUSG00000054555 | 30 | 6  |
| 75770 | -6.8531 | -2.28194 | 9.96E-05 | 0.008204<br>501 | ENSMUSG00000053046 | 30 | 12 |
| 80901 | -6.8531 | -2.28194 | 9.96E-05 | 0.008204<br>501 | ENSMUSG00000048521 | 30 | 14 |
